# Supplementary material
Source: PubMed Central journal article supplement (PMC7350081)
Supplement: 2020-00066R1_Production_Supplemental_Material_online_supp.pdf [file 2020-00066R1_Production_Supplemental_Material_online_supp.pdf]

## **SUPPORTING INFORMATION**

**Fig. S1.** Mean number of mast cells counted by toluidine blue histochemistry for each patient. Error bars indicate SEM. \*P < 0.05, \*\*P < 0.01, \*\*\*P < 0.001, \*\*\*\*P < 0.0001, ns; not significant.

Patient1

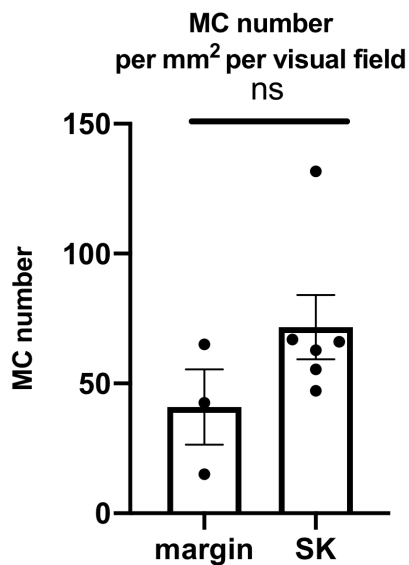

Patient2

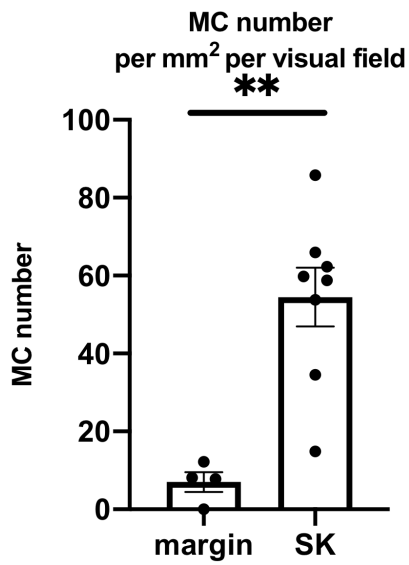

Patient3

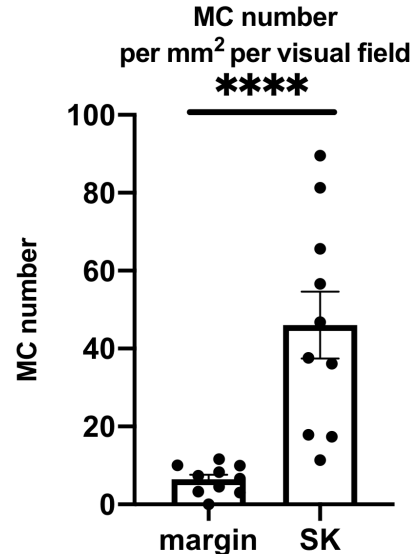

Patient4

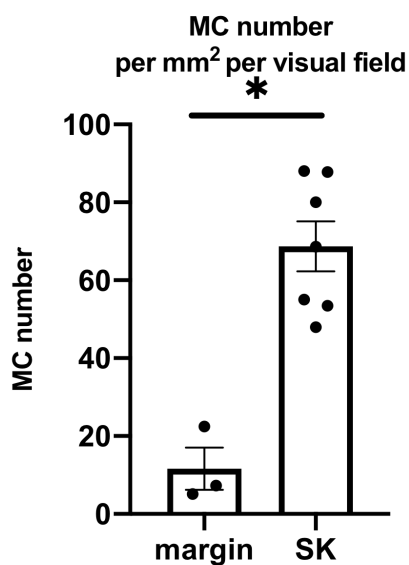

Patient5

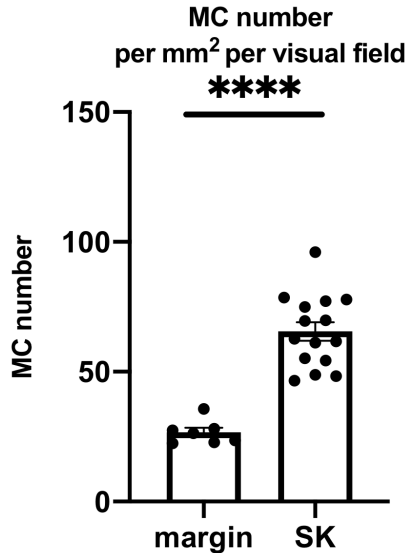

Patient6

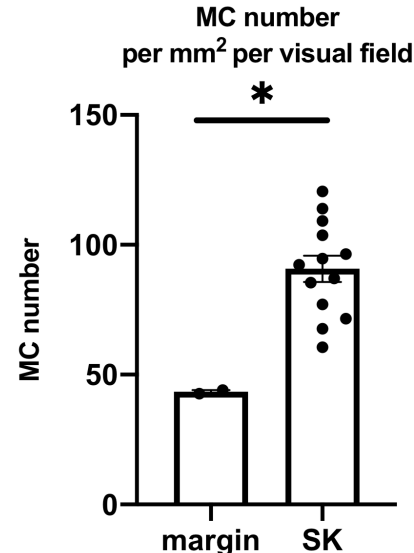

Patient7

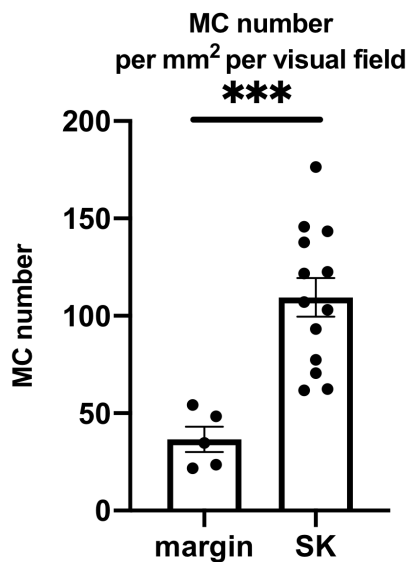

Patient8

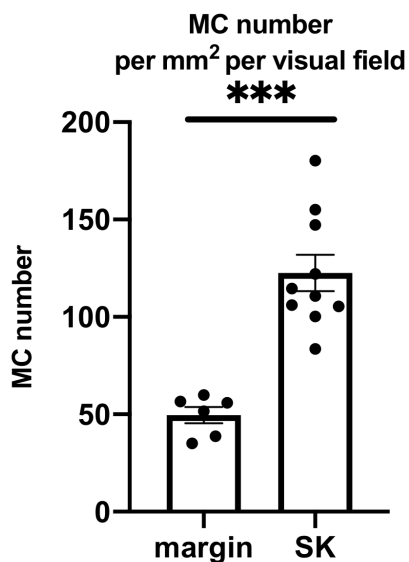

Patient9

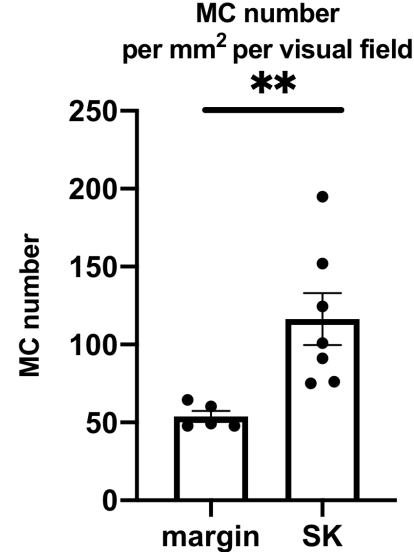

Fig. S1.

**Fig. S2.** Mean number of tryptase-positive cells for each patient. Error bars indicate SEM. \*P < 0.05, \*\*P < 0.01, \*\*\*P < 0.001, \*\*\*\*P < 0.0001, ns; not significant.

### Patient1

Tryptase positive cell number per mm<sup>2</sup> per visual field

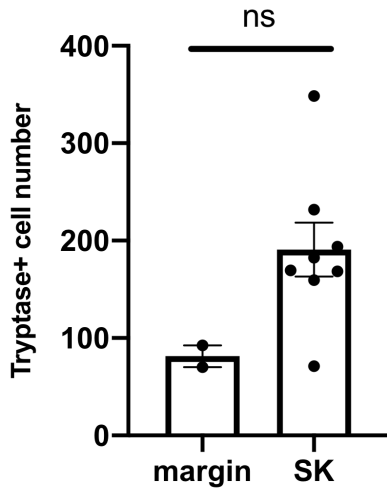

### Patient2

Tryptase positive cell number per mm<sup>2</sup> per visual field

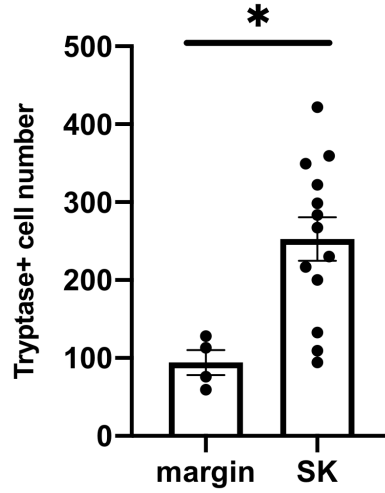

### Patient3

Tryptase positive cell number per mm<sup>2</sup> per visual field

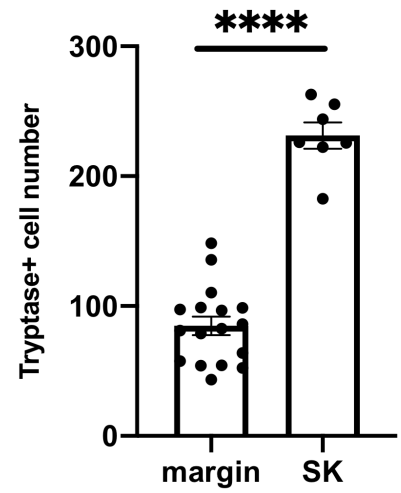

### Patient4

Tryptase positive cell number per mm<sup>2</sup> per visual field

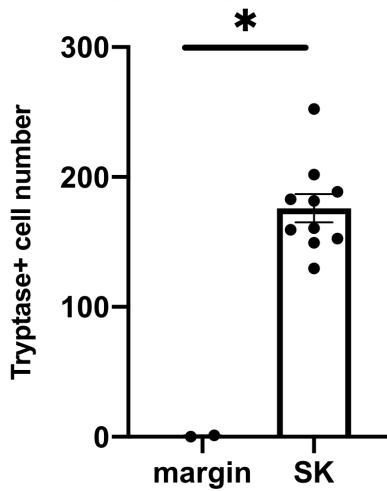

### Patient5

Tryptase positive cell number per mm<sup>2</sup> per visual field

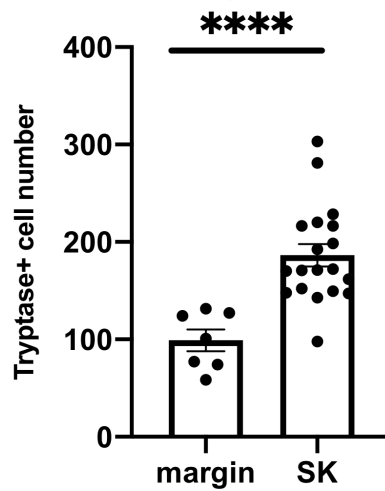

### Patient6

Tryptase positive cell number per mm<sup>2</sup> per visual field

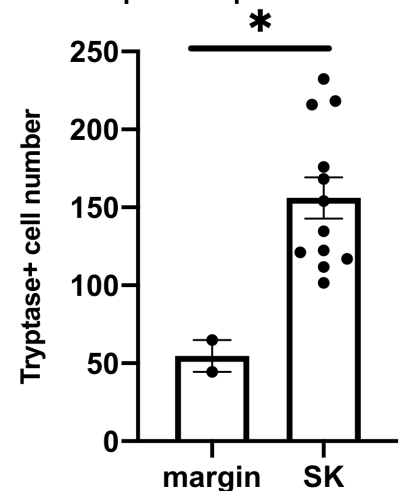

### Patient7

Tryptase positive cell number per mm<sup>2</sup> per visual field

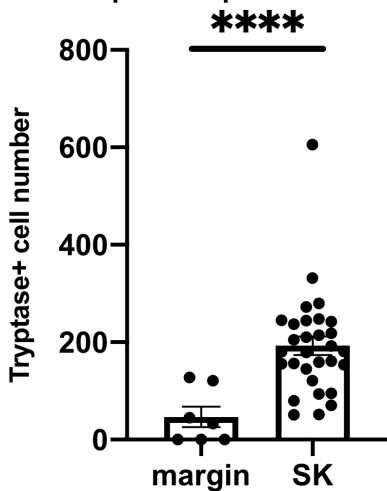

### Patient8

Tryptase positive cell number per mm<sup>2</sup> per visual field

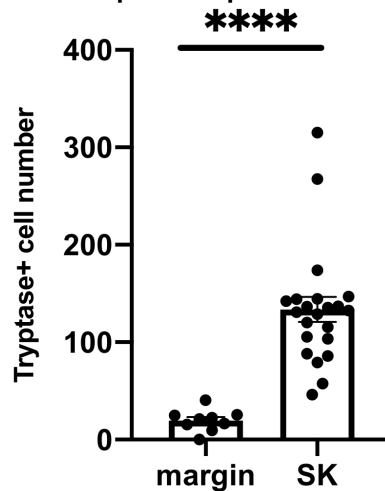

### Patient9

Tryptase positive cell number per mm<sup>2</sup> per visual field

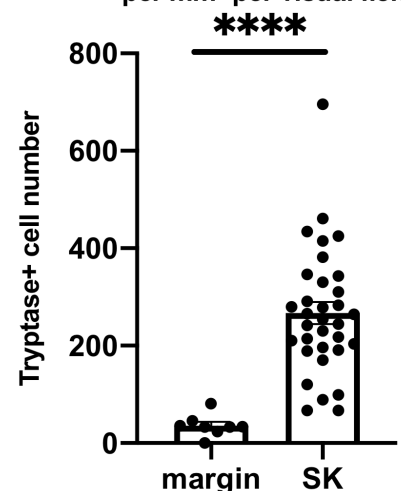

Fig. S2.

**Fig. S3.** Mean number of c-Kit-positive cells for each patient. Error bars indicate

SEM. \*P < 0.05, \*\*P < 0.01, \*\*\*P < 0.001, \*\*\*\*P < 0.0001, ns; not significant.

### Patient1

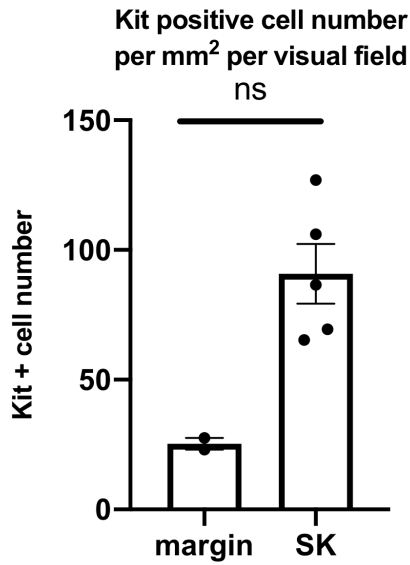

### Patient2

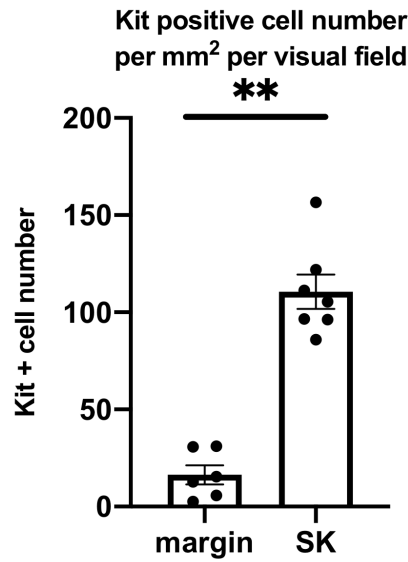

### Patient3

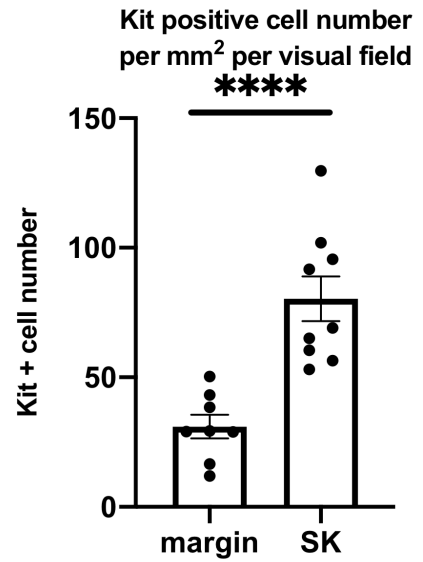

### Patient4

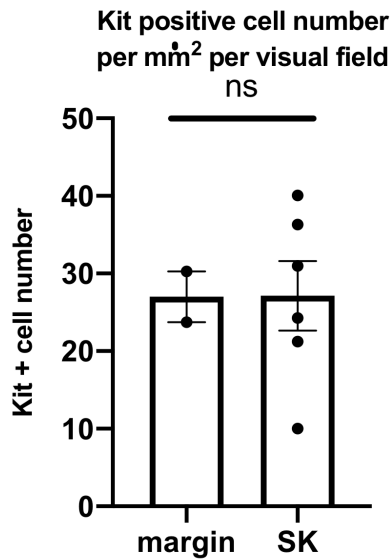

### Patient5

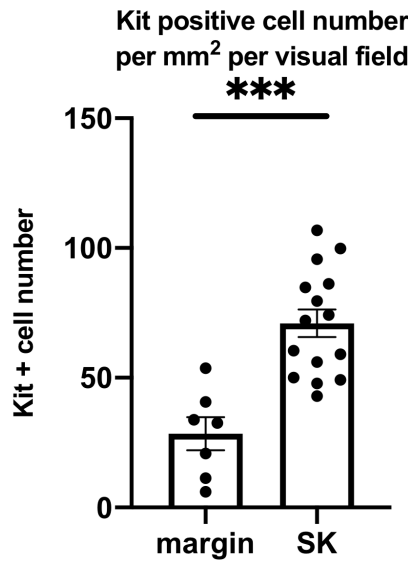

### Patient6

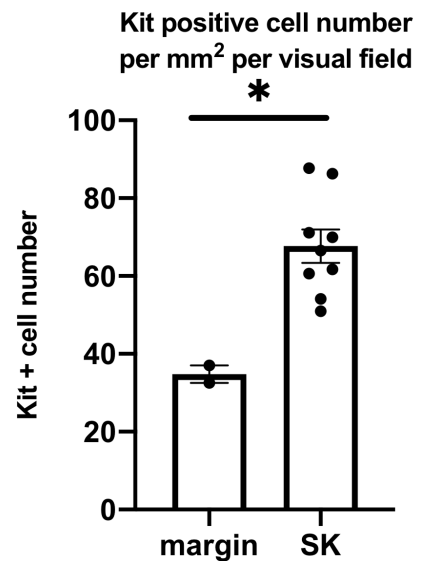

### Patient7

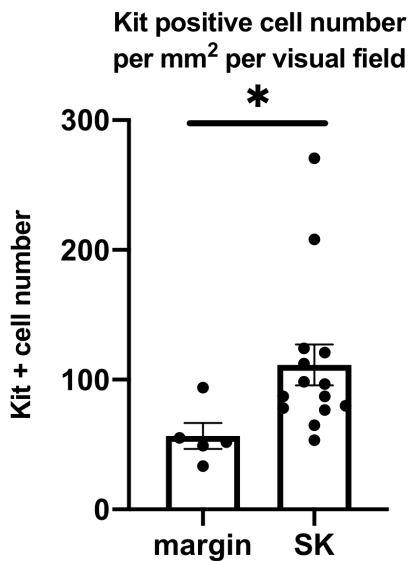

### Patient8

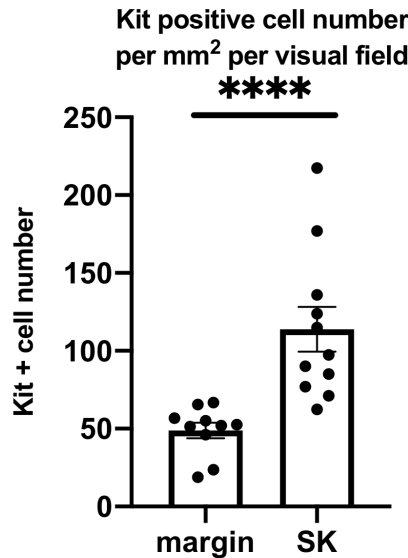

### Patient9

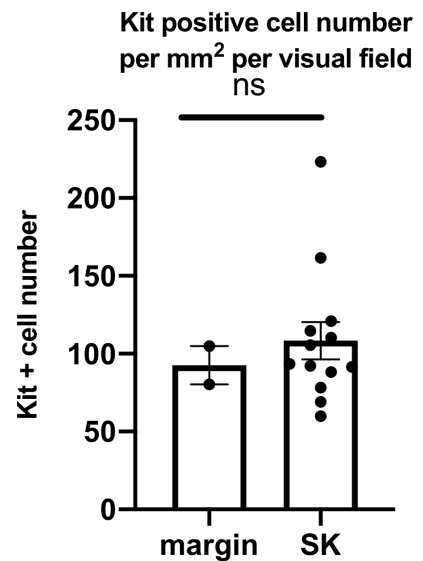

Fig. S3.

**Fig. S4.** Mean number of chymase-positive cells for each patient. Error bars indicate SEM. \*P < 0.05, \*\*P < 0.01, \*\*\*P < 0.001, \*\*\*\*P < 0.0001, ns; not significant.

### Patient1

Chymase positive cell number  
per mm<sup>2</sup> per visual field

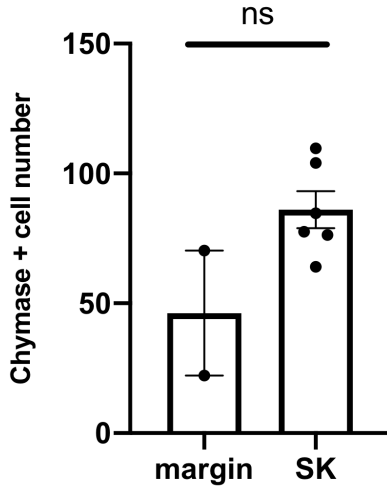

### Patient2

Chymase positive cell number  
per mm<sup>2</sup> per visual field

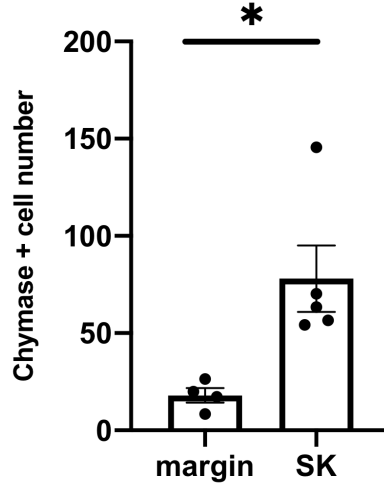

### Patient3

Chymase positive cell number  
per mm<sup>2</sup> per visual field

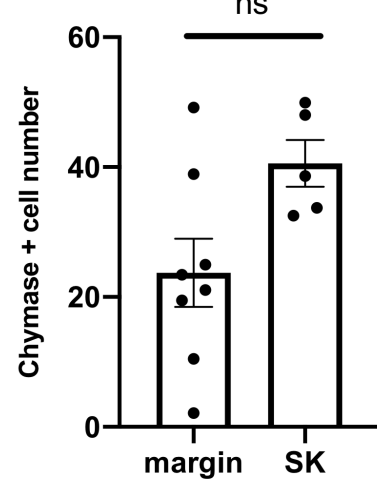

### Patient4

Chymase positive cell number  
per mm<sup>2</sup> per visual field

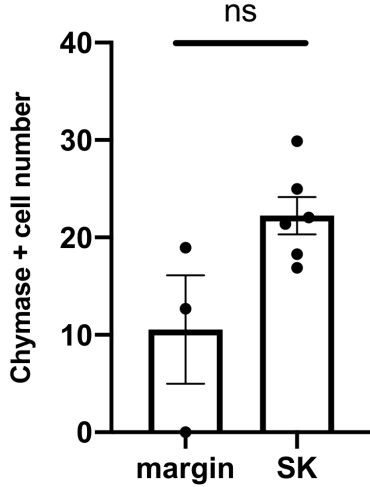

### Patient5

Chymase positive cell number  
per mm<sup>2</sup> per visual field

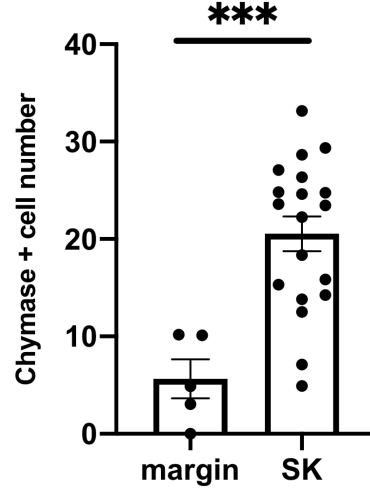

### Patient6

Chymase positive cell number  
per mm<sup>2</sup> per visual field

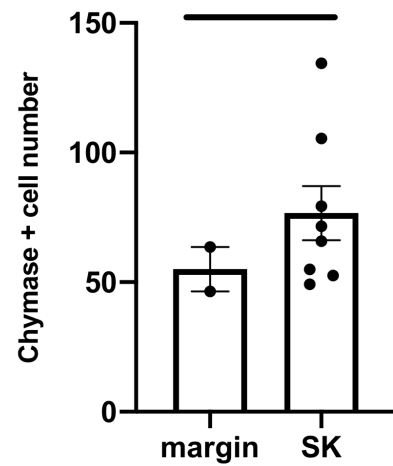

### Patient7

Chymase positive cell number  
per mm<sup>2</sup> per visual field

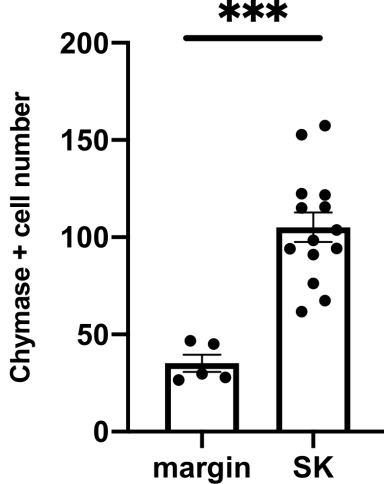

### Patient8

Chymase positive cell number  
per mm<sup>2</sup> per visual field

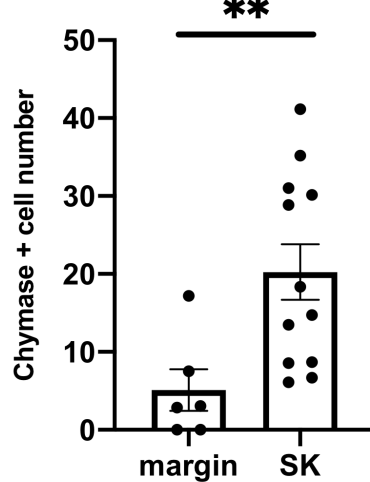

### Patient9

Chymase positive cell number  
per mm<sup>2</sup> per visual field

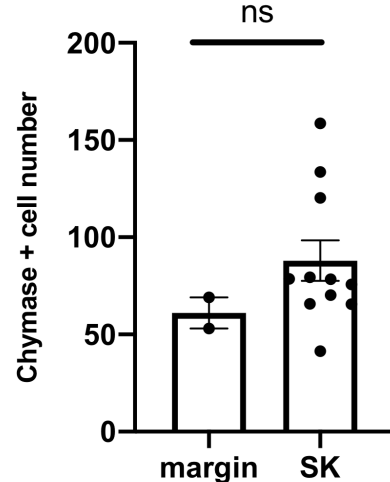

Fig. S4.



**Fig. S5.** Mean proportion of degranulated mast cells for each patient based on tryptase immunohistochemistry. Error bars indicate SEM. \*P < 0.05, \*\*P < 0.01, \*\*\*P < 0.001, \*\*\*\*P < 0.0001, ns; not significant.

### Patient1

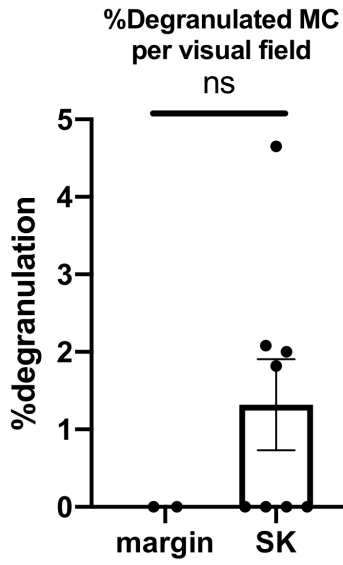

### Patient2

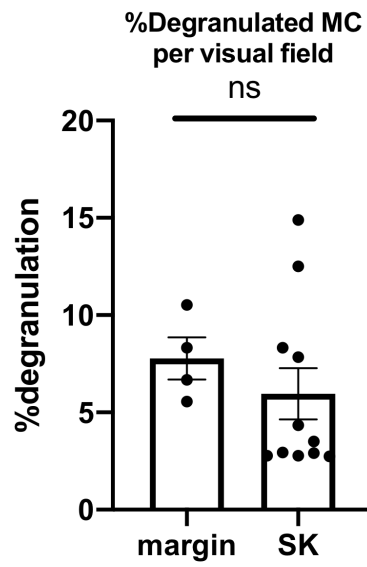

### Patient3

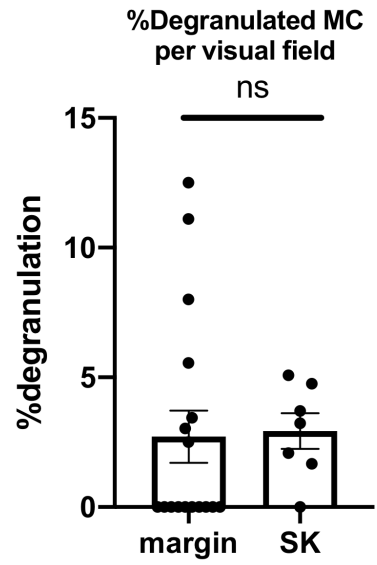

### Patient4

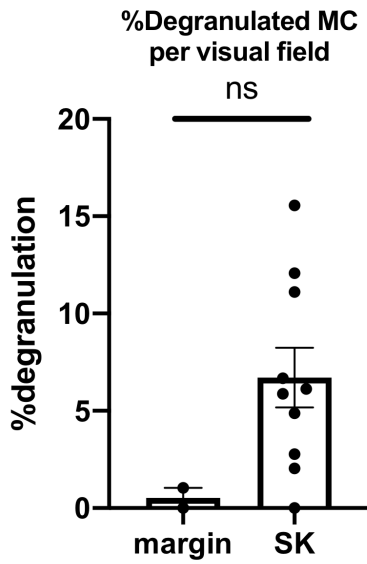

### Patient5

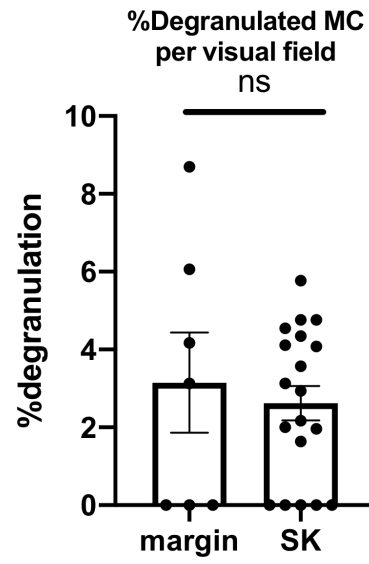

### Patient6

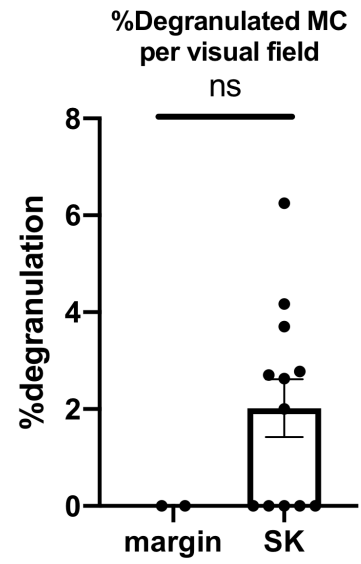

### Patient7

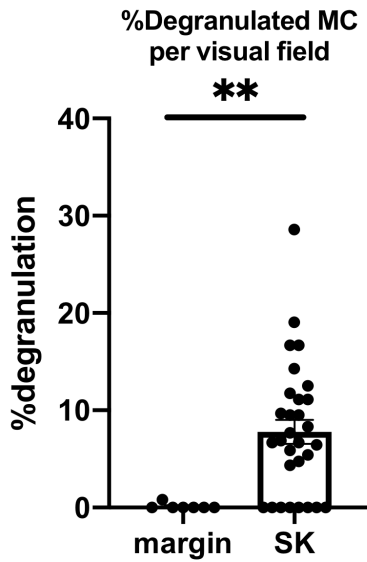

### Patient8

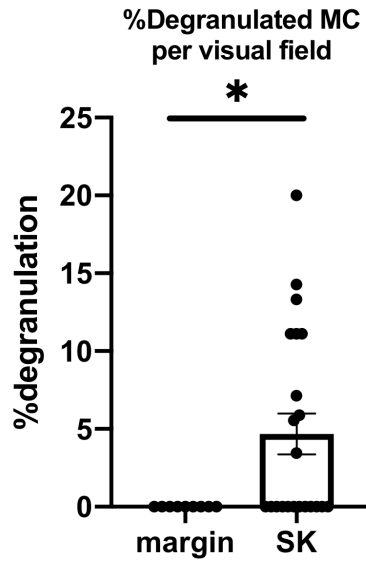

### Patient9

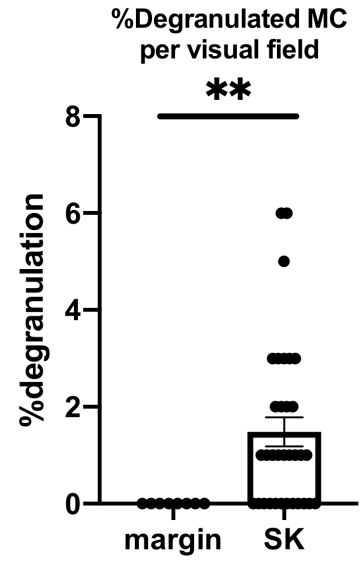

Fig. S5.

**Fig. S6.** Mean SCF immunoreactivity in the epidermis for each patient. Error bars indicate SEM. \*P < 0.05, \*\*P < 0.01, \*\*\*P < 0.001, \*\*\*\*P < 0.0001, ns; not significant.

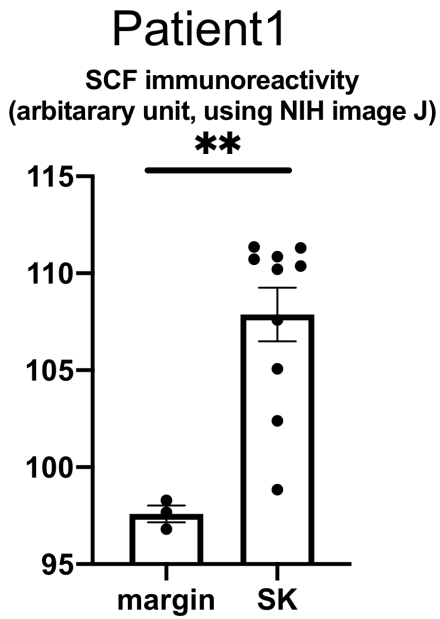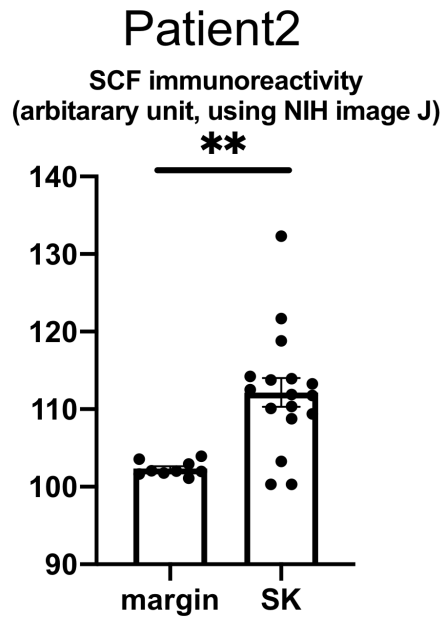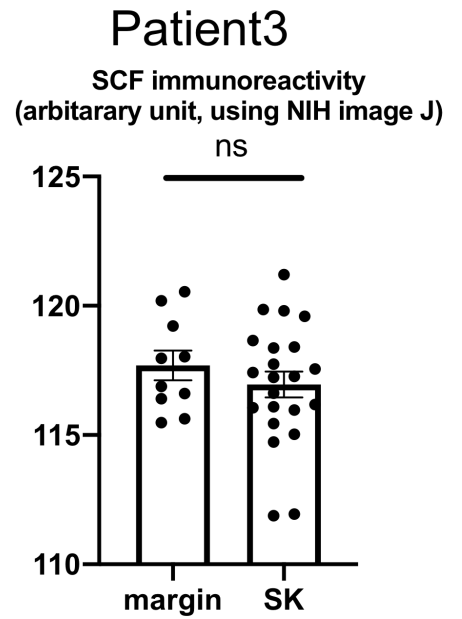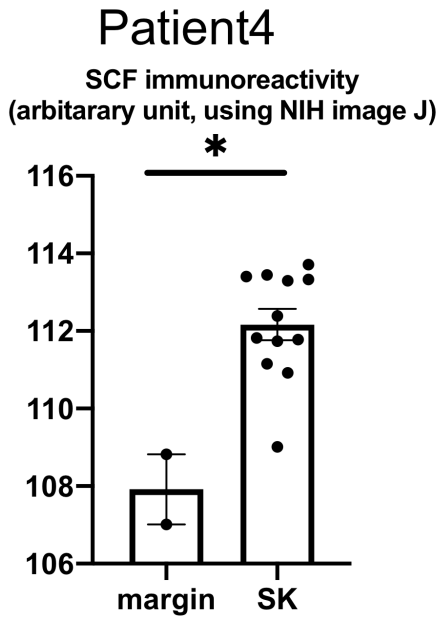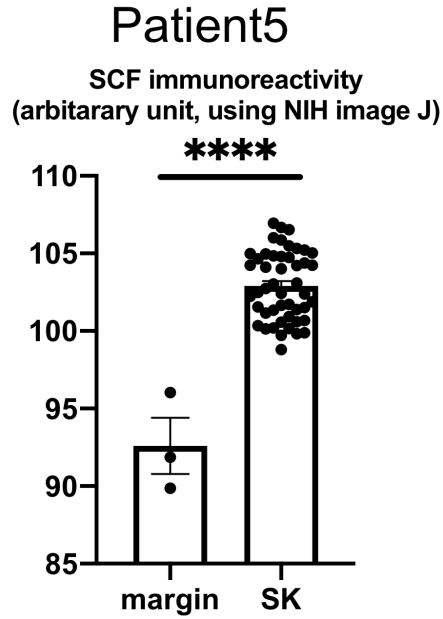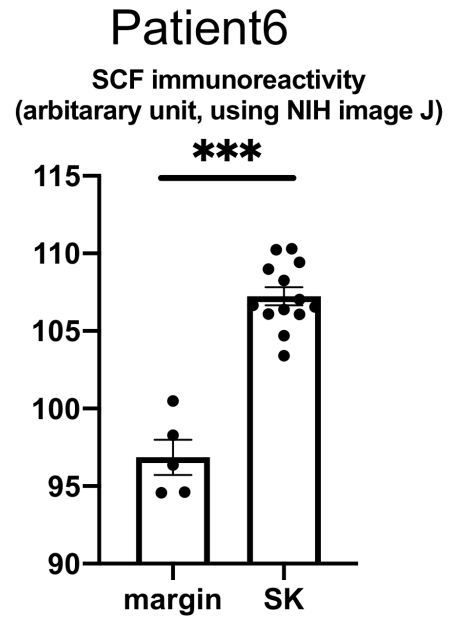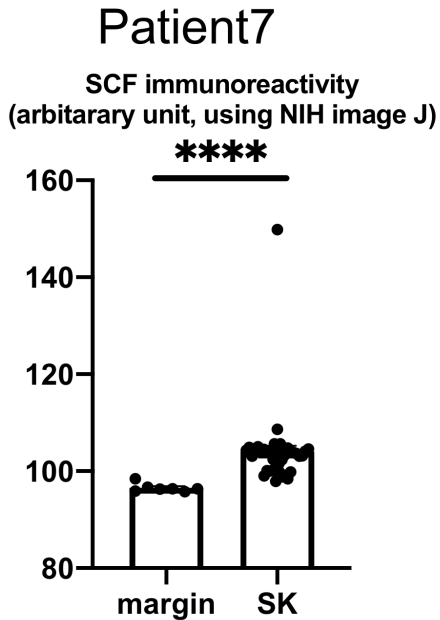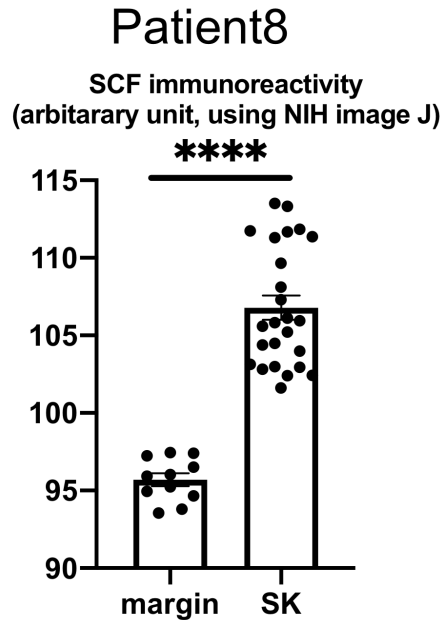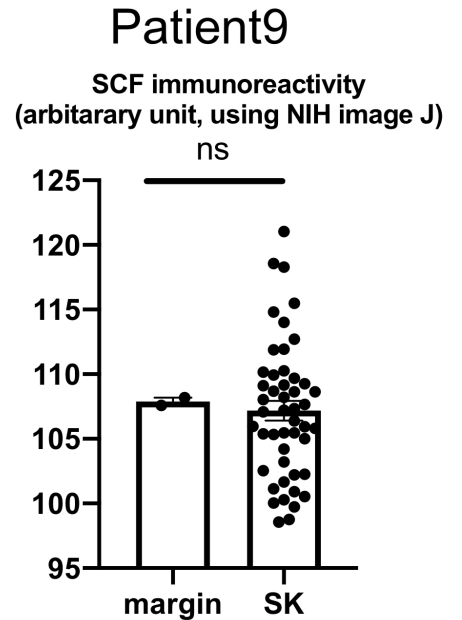

Fig. S6.

**Fig. S7.** NGF immunohistochemistry showed no significant difference in the mean NGF immunoreactivity within the tumor compared to its marginal lesion.

Error bars indicate SEM, n=9. ns; not significant. Scale bar = 50  $\mu$ m.

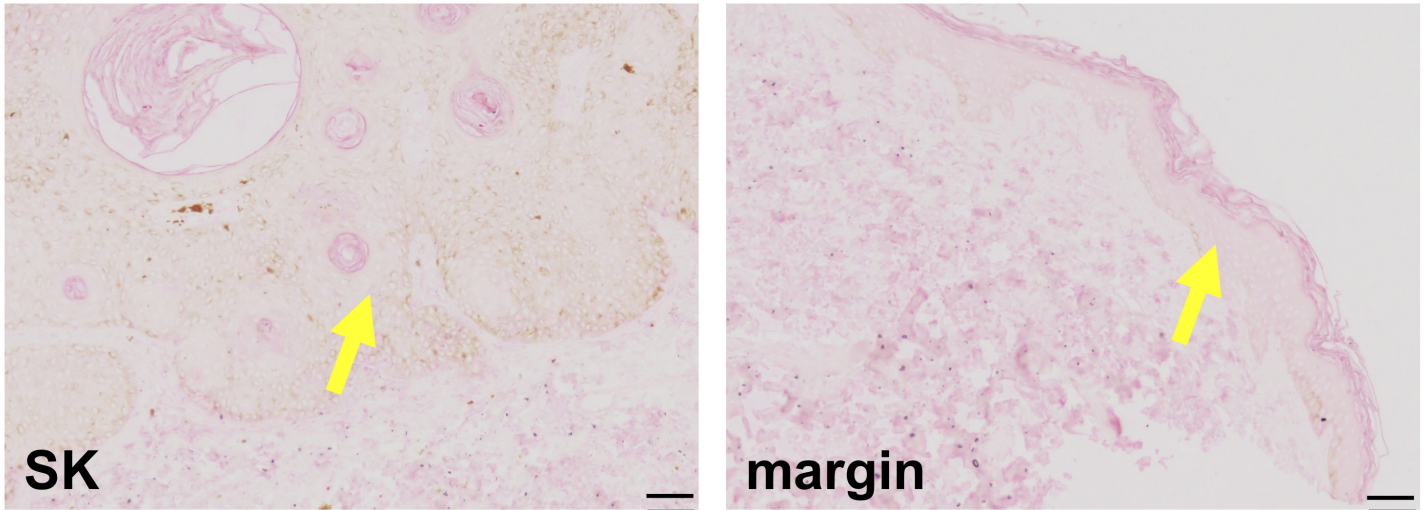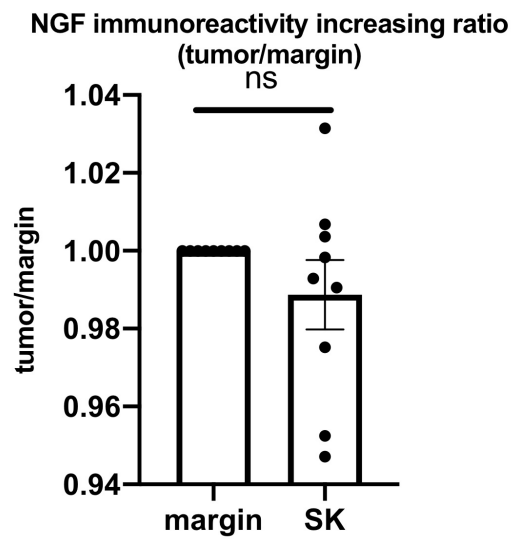

Fig. S7.

**Fig. S8.** Mean CB1 immunoreactivity in the epidermis for each patient. Error bars

indicate SEM. \*P < 0.05, \*\*P < 0.01, \*\*\*P < 0.001, \*\*\*\*P < 0.0001.

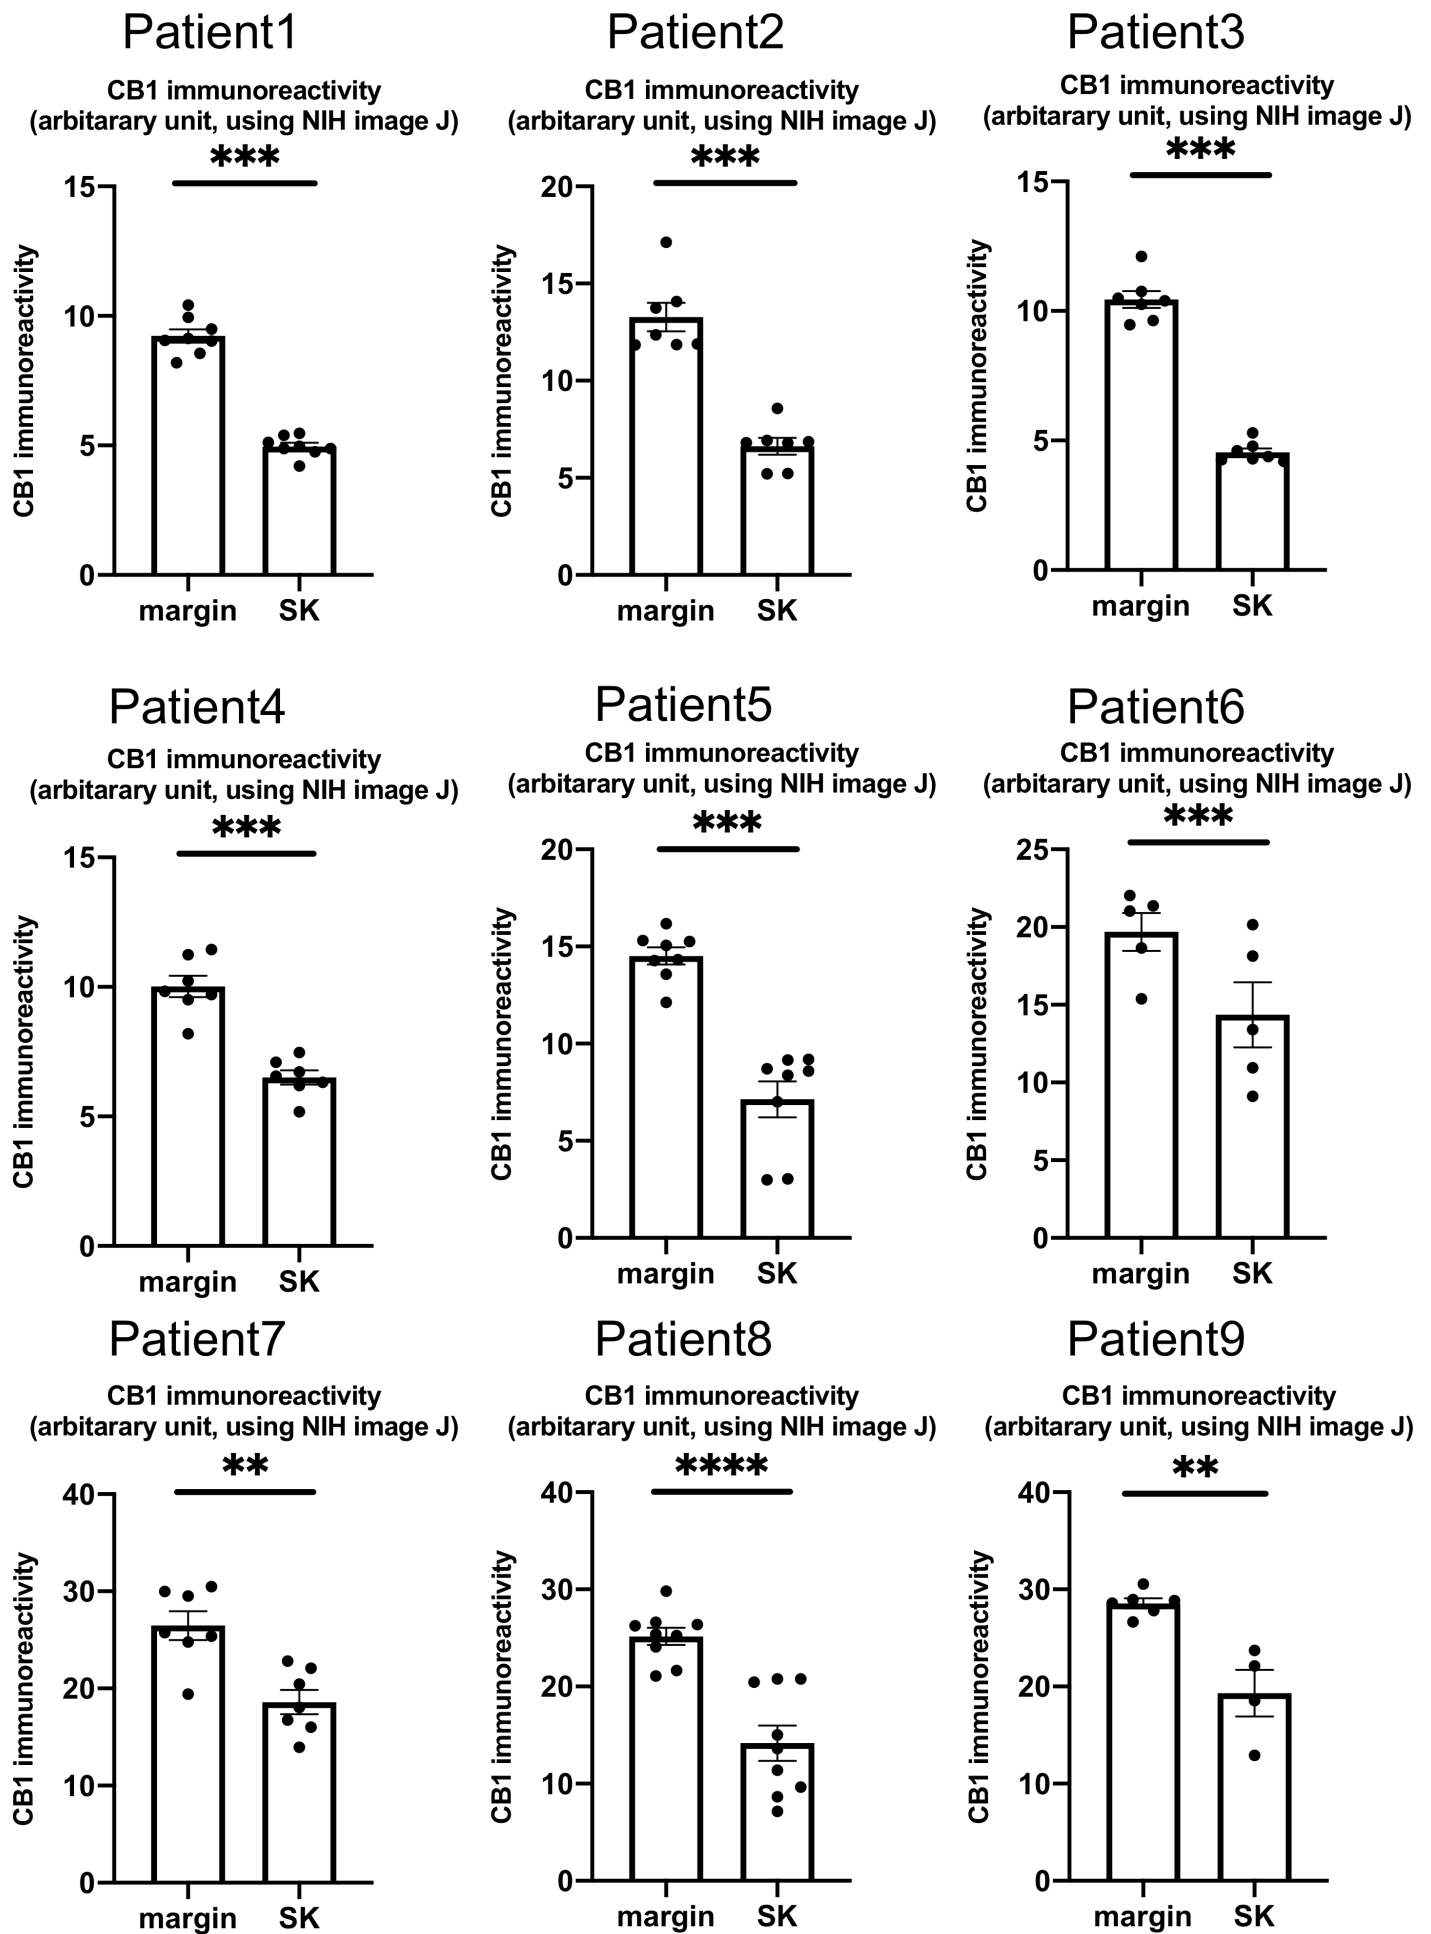

Fig. S8.
